# Supplementary material for: N-Acetyl Cysteine Overdose Inducing Hepatic Steatosis and Systemic Inflammation in Both Propacetamol-Induced Hepatotoxic and Normal Mice
Source: PubMed Central journal article supplement (PMC8000488; doi:10.3390/antiox10030442), 2021-03-12
Supplement: antioxidants-10-00442-s001.pdf [file antioxidants-10-00442-s001.pdf]

Supplementary Figures:

*Figure S1: Elevated levels of NAC do not show significant effect on hepatic cyclin D1 levels in recovery stage.*

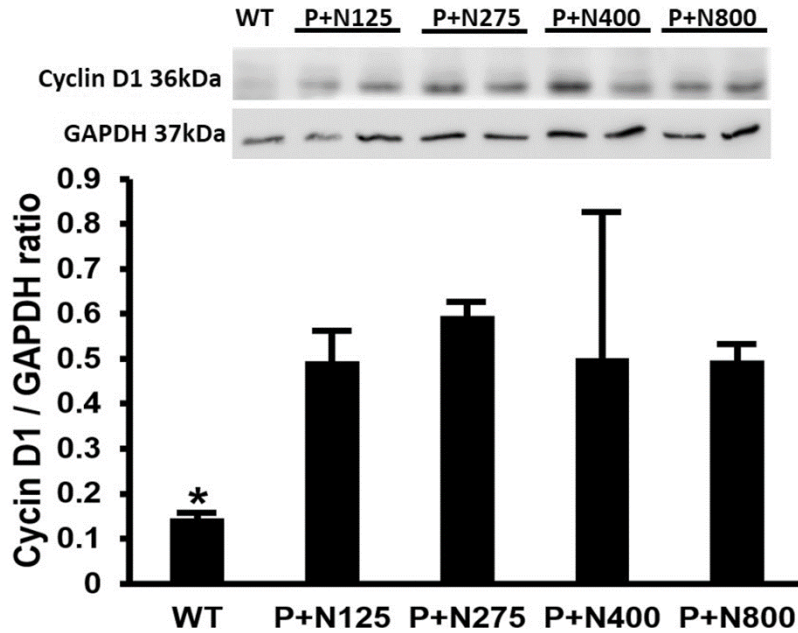

*Figure S1. Effect of different doses of NAC therapy on cyclin D1 levels in BALB/c mice at 48 h post-propacetamol injection. Significant differences compared with the P+N125 group are indicated by \* (P < .05).*

*Figure S2: High-dose NAC treatment reduces hepatic GSH levels*

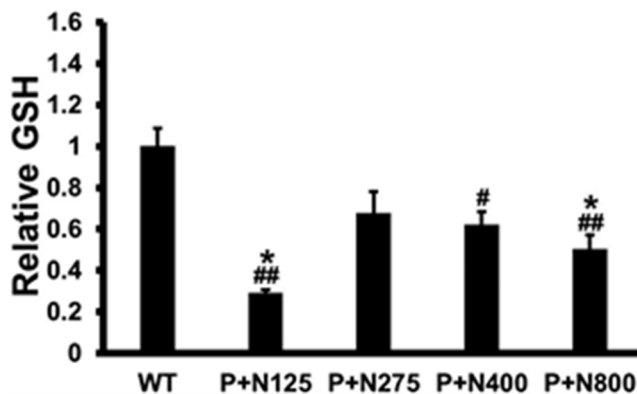

*Figure S2. Effects of different doses of NAC on hepatic reduced GSH levels in BALB/c mice at 48 h post-propacetamol injection. The GSH levels in the WT group were defined as 100%. Significant differences compared with the WT group are indicated by # (P < .05) and ## (P < .01). Significant differences compared with the P+N275 group are indicated by \* (P < .05).*

Figure S3: High-dose NAC treatment induces serum T-CHO levels in liver

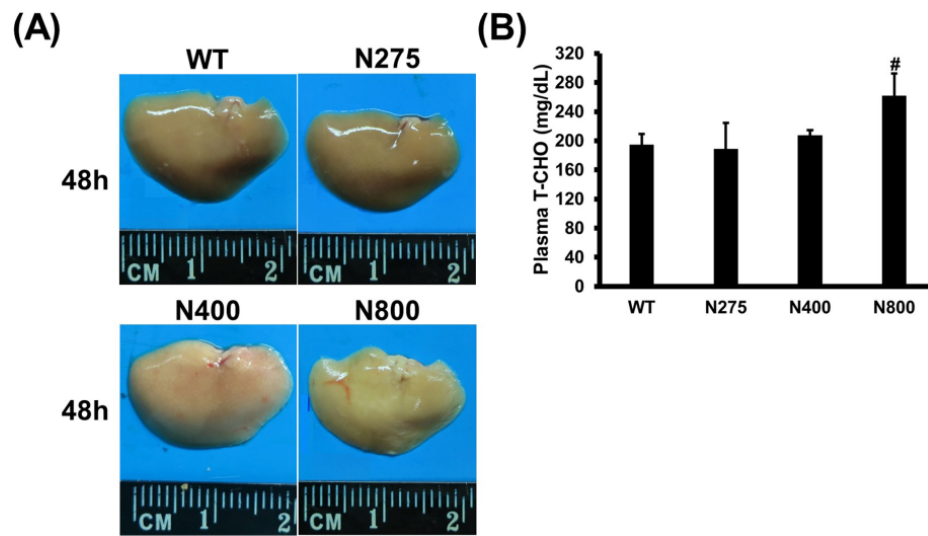

Figure S3. Effects of different doses of NAC on liver appearances (A) and serum T-CHO levels (B) in BALB/c mice at 48 h post NAC-injection. Significant difference compared with the WT group is indicated by # ( $P < .05$ ).

Figure S4: High-dose NAC treatment induced body weight losses

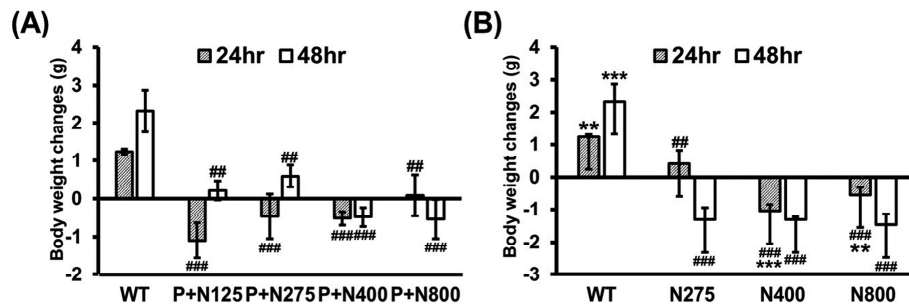

Figure S4. Body weight changes in BALB/c mice of different doses of the NAC therapy (A) and the NAC treatment (B) groups at indicated time points. Significant differences compared with the WT group are indicated by # ( $P < .05$ ), ## ( $P < .01$ ) and ### ( $P < .001$ ). Significant differences compared with the N275 group are indicated by \*\* ( $P < .01$ ) and \*\*\* ( $P < .001$ ).
